# Supplementary material for: Nutritional status and dietary intake among Nigerian adolescent: a systematic review
Source: BMC Public Health. 2024 Jul 2;24:1764. doi: 10.1186/s12889-024-19219-w (PMC11221175; doi:10.1186/s12889-024-19219-w)
Supplement: Supplementary file 1 — Additional file 1: The data extracted from the 51 studies including authors, date of publication, state where the study conducted, target population, study setting, sample size and key findings. [file 12889_2024_19219_MOESM1_ESM.xlsx]

## Sheet: Sheet1
Supplementary Table 2. NIH quality assessment score for the included study
Study	Was the research question or objective in this paper clearly stated?	Was the study clearly specified and defined?	Was the participant rate of eligible person at least 50%	Were all the subjects selected or recruited from the same or similar populations?	Was a sample size justification, power description, or variance and effect estimates provided?	For the analysis in this paper, were the exposure(s) of interest measured prior to the outcomes(s) being measured?	Was the timeframe sufficient so that one could reasonably expect to see an association between exposure and outcome if it existed?	For exposures that can vary in amount or level, did the study examine different level of the exposure as related to the outcome?	Were the exposure measures (independent variables) clearly defined, valid, reliable, and implemented consistently across all study participants?	Was the exposure(s) assessed more than once over time?	Were the outcome measure (dependent variables) clearly defined, valid, reliable, and implemented consistently across all the study participants?	Were the outcome assessors blinded to the exposure status of participants?	Was loss to follow-up after baseline 20% or less?	Were key potential confounding variables measured and adjusted statistically for their impact on the relationship between exposure(s) and outcome(s)?	Quality (0 – 14)	Overall Quality
Abdulkarim et al., (2016)	ü	ü	ü	ü	ü	X	X	ü	ü	X	ü	NA	NA	NA	8	I
Adeomi et al., (2022a)	ü	ü	ü	ü	ü	X	X	ü	ü	X	ü	NA	NA	ü	9	I
Adeomi et al., (2019)	ü	ü	ü	ü	ü	X	X	ü	ü	X	ü	NA	NA	NA	8	I
Adeomi et al., (2021)	ü	ü	ü	ü	ü	X	X	ü	ü	X	ü	NA	NA	NA	8	I
Adeomi et al., (2020)	ü	ü	ü	ü	ü	X	X	ü	ü	X	ü	NA	NA	ü	9	I
Adetunji et al., (2019)	ü	ü	ü	ü	ü	X	X	ü	ü	X	ü	NA	NA	ü	9	I
Adeomi et al., (2022b)	ü	ü	ü	ü	ü	X	X	ü	ü	X	ü	NA	NA	ü	9	I
Agofure et al., (2021)	ü	ü	ü	ü	ü	X	X	ü	ü	X	ü	NA	NA	NA	8	I
Akinola et al., (2016)	ü	ü	ü	ü	X	X	X	ü	ü	X	ü	NA	NA	NA	7	I
Anyanwu et al., (2019)	ü	ü	ü	ü	X	X	X	ü	ü	X	ü	NA	NA	NA	7	I
Ayogu, (2019)	ü	ü	ü	ü	X	X	X	ü	ü	X	ü	NA	NA	NA	7	I
Ayogu et al., (2016)	ü	ü	ü	ü	ü	X	X	ü	ü	X	ü	NA	NA	ü	9	I
Ayogu et al., (2018)	ü	ü	ü	ü	ü	X	X	ü	ü	X	ü	NA	NA	ü	9	I
Chinedu et al., (2017)	ü	ü	ü	ü	X	X	X	ü	ü	X	ü	NA	NA	ü	8	I
Darling et al., (2020)	ü	ü	ü	ü	ü	X	X	ü	ü	X	ü	NA	NA	ü	9	I
Eme et al., (2016b)	ü	ü	ü	ü	X	X	X	ü	ü	X	ü	NA	NA	NA	7	I
Eme et al., (2016a)	ü	ü	ü	ü	X	X	X	ü	ü	X	ü	NA	NA	NA	7	I
Eze et al., 2017)	ü	ü	ü	ü	X	X	X	ü	ü	X	ü	NA	NA	NA	7	I
Ezeudu et al., (2018)	ü	ü	ü	ü	X	X	X	ü	ü	X	ü	NA	NA	NA	7	I
Gezawa et al., (2013)	ü	ü	ü	ü	X	X	X	ü	ü	X	ü	NA	NA	NA	7	I
Isezuo et al., (2018)	ü	ü	ü	ü	X	X	X	ü	ü	X	ü	NA	NA	NA	7	I
Kayode & Alabi,(2020)	ü	ü	ü	ü	ü	X	X	ü	ü	X	ü	NA	NA	NA	8	I
Lateef et al., (2016a)	ü	ü	ü	ü	X	X	X	ü	ü	X	ü	NA	NA	NA	7	I
Lateef et al., (2016b)	ü	ü	ü	ü	X	X	X	ü	ü	X	ü	NA	NA	NA	7	I
Menakaya & Menakaya, (2022)	ü	ü	ü	ü	ü	X	X	NA	NA	X	ü	NA	NA	NA	6	I
Morakinyo et al., (2020)	ü	ü	ü	ü	ü	X	X	ü	ü	X	ü	NA	NA	CD	8	I
Mustapha & Sanusi, (2013)	ü	ü	ü	ü	X	X	X	ü	ü	X	ü	NA	NA	NA	7	I
Nwanneka et al., (2016)	ü	ü	ü	ü	X	X	X	ü	ü	X	ü	NA	NA	NA	7	I
Olatona et al., (2022)	ü	ü	ü	ü	ü	X	X	ü	ü	X	ü	NA	NA	NA	8	I
Oludare, (2015)	X	ü	ü	ü	X	X	X	ü	ü	X	ü	NA	NA	NA	6	I
Olumakaiye, (2013)	ü	ü	ü	ü	X	X	X	ü	ü	X	ü	NA	NA	CD	7	I
Omobuwa et al., (2014)	ü	ü	ü	ü	X	X	X	ü	ü	X	ü	NA	NA	NA	7	I
Omuemu & Oko-Oboh, (2015)	ü	ü	ü	ü	X	X	X	ü	ü	X	ü	NA	NA	NA	7	I
Onyiriuka, Umoru, et al., (2013)	ü	ü	ü	ü	X	X	X	ü	ü	X	ü	NA	NA	NA	7	I
Onyiriuka, Ibeawuchi, et al., (2013)	ü	ü	ü	ü	X	X	X	ü	ü	X	ü	NA	NA	NA	7	I
Oriaifo et al., (2020)	ü	ü	ü	ü	ü	X	X	ü	ü	X	ü	NA	NA	NA	8	I
Sanusi et al., (2022)	ü	ü	ü	ü	X	X	X	ü	ü	X	ü	NA	NA	NA	7	I
Senbanjo et al., (2014)	ü	ü	ü	ü	X	X	X	ü	ü	X	ü	NA	NA	NA	7	I
Sholeye et al., (2018)	ü	ü	ü	ü	ü	X	X	ü	ü	X	ü	NA	NA	NA	8	I
Tassy et al., (2021)	ü	ü	ü	ü	X	X	X	ü	ü	X	ü	NA	NA	NA	8	I
Tokunbo et al., (2014)	ü	ü	ü	ü	X	X	X	ü	ü	X	ü	NA	NA	NA	7	I
Toriola et al., (2018)	ü	ü	ü	ü	X	X	X	ü	ü	X	ü	NA	NA	NA	7	I
Ubesie et al., (2016)	ü	ü	ü	ü	X	X	X	ü	ü	X	ü	NA	NA	CD	7	I
Umeokonkwo et al., 2020)	ü	ü	ü	ü	ü	X	X	ü	ü	X	ü	NA	NA	NA	8	I
Wariri et al., (2020)	ü	ü	ü	ü	ü	X	X	ü	ü	X	ü	NA	NA	NA	8	I
Adekanmbi et al., (2016)	ü	ü	ü	ü	ü	X	X	ü	ü	X	ü	NA	NA	NA	8	I
Akhimienho & Uwaibi, (2022)	ü	ü	ü	ü	ü	X	X	ü	ü	X	ü	NA	NA	NA	8	I
Gadanya et al., (2022)	ü	ü	ü	ü	ü	X	X	ü	ü	X	ü	NA	NA	NA	8	I
Omotoso et al., (2022)	ü	ü	ü	ü	X	X	X	ü	ü	X	ü	NA	NA	CD	7	I
Otuneye et al., (2017)	ü	ü	ü	ü	ü	X	X	ü	ü	X	ü	NA	NA	ü	9	I
Yusuf et al., 2021)	ü	ü	ü	ü	X	X	X	ü	ü	X	ü	NA	NA	NA	7	I
ü = Yes, X= No, CD= Cannot determine, NA= Not Applicable, I= Fair
