# Supplementary material for: Nutritional status and dietary intake among Nigerian adolescent: a systematic review
Source: BMC Public Health. 2024 Jul 2;24:1764. doi: 10.1186/s12889-024-19219-w (PMC11221175; doi:10.1186/s12889-024-19219-w)
Supplement: Supplementary file 2 — Additional file 2: Provide NIH Quality Assessment 14 criteria for the study. It shows the score for each study and the total quality. [file 12889_2024_19219_MOESM2_ESM.xlsx]

## Sheet: Sheet1
Supplementary Table 1. Data extracted from the 51 articles included.
Author (year)	State	Study design	Target Population (n = Sample size)	Outcome(s) of interest & classification criteria used	Key Findings
Abdulkarim et al., (2016)	Abuja.	Cross-sectional	10-19 years, in school, male and female (n= 1700)	Overweight, obesity, wasting, stunting, underweight,	Overweight prevalence was 13.2%, stunting was 11.3%, obesity was 2.6% and wasting was 1.7%.
				(WHO growth reference for 5-19years, 2007).
Adeomi et al., (2022a)	Gombe & Osun state.	Cross-sectional	6-19 years, in a community, male and female (n= 1200)	Dietary diversity and pattern. BMI-for-age Z-scores categorized into thinness, normal, and overweight/obese for <-2, -2 to 1, >1 respectively. (WHO growth reference, 2007)	Gombe: Thinness prevalence was 13.8%, Normal weight was 79.3% and overweight/obesity was 6.8%.
					Osun: thinness prevalence 6.7%, normal weight was 77.3% and overweight/obesity was 16.0%. A diversified dietary pattern was characterized by a high intake of fish, egg and products, milk and dairy, desserts, and snacks. Dietary diversity score was 49.1% low and 47.3% were food insecure.
Adeomi et al., (2019)	Ile-Ife, Osun state.	Cross-sectional	10-19 years, in-school children, male and female (n= 313)	BMI-for-age Z-score category. (WHO 2007 reference for children 5–19 years).	The prevalence of underweight was 12.1%, overweight and obesity was 10.2%, and it was significantly higher among females (12.5%) than males (7.0%).
Adeomi et al., (2021)	Gombe & Osun state.	Cross-sectional	6-19 years, in a community, male and female (n= 1200)	BMI-for-age Z-scores category. (WHO BMI reference value, 2007)	Prevalence rate of stunting was 34.9%, underweight was 13.5%, thinness was 10.3% and overweight/obese was 11.4% and 4.0%. Gombe State had higher burden of stunted (47.2%), underweight (21%), and thin (13.8%) children than Osun State (22.7%, 7.4%, 6.7% respectively), while Osun State had higher burden of overweight/obesity (16%) than Gombe state (6.8%).
Adeomi et al., (2020)	Ile-Ife, Osun.	Cross-sectional	10-19 years, in school, male and female (n= 400)	Dietary pattern, overweight and Obesity. (WHO reference charts, 2007)	The prevalence of overweight/obesity was 12.8%. Dietary pattern dominated by starchy foods, roots, and tubers.
Adetunji et al., (2019)	Edo State.	Cross-sectional	6-11 years, in school male and female (n= 1187)	BMI-for-age Z-score category. Using WHO BMI reference value, (2007).	Prevalence of overweight/obesity was 4.9%, normal weight was 91.6% and underweight was (thin/severely thin) 3.5%.
Adeomi et al., (2022b)	Gombe& Osun state.	Cross-sectional	6-19 years, in a community, male and female (n= 1200)	BMI-for-age Z-scores and categorized into: (1) thinness, (2) normal, and (3) overweight/obese for BMI-for-age Z-scores <-2, -2 to 1, >1 respectively. (WHO reference chart, 2007)	The prevalence of underweight was 10.3% while overweight/obesity was 11.4%.
Agofure et al., (2021)	Delta State.	Cross-sectional	12-18years, in school, all females (n= 201)	Dietary pattern.	The dietary pattern of the respondents demonstrated that they consumed protein, carbohydrate, and snacks occasionally. Underweight prevalence was 46.80% and normal was 31.80%.
				The BMI was graded as <18.5kg/m² for underweight, 18.5-24.9 kg/m² as normal or healthy weight, and >25 kg/m² as overweight.
Akinola et al., (2016)	Lagos State.	Cross-sectional	10-19 years, in school, male and female	Overweight and obesity percentile for age and sex. (CDC Clinical growth charts, 2013).	Prevalence of overweight and obesity were 5.8% and 1.7% respectively. Prevalence of overweight and obesity in private schools were higher than in public schools.
			(n= 1100)
Anyanwu et al., (2019)	Enugu State.	Cross-sectional	Senior secondary class two students. School male and female adolescent (n= 200)	Dietary pattern and food choice and effect of food intake.	Dietary pattern shows low meat, fish, and egg consumption while more of yam, rice, pasta, pries. Beans. Personal choice, economic reasons and school regulations affect the food choice of adolescents.
Ayogu, (2019)	Ede-Oballa, Enugu State.	Cross-sectional	6-15years, school male and female (n= 90)	Dietary diversity score (DDS) energy, and nutrient intake. Factors affect dietary diversity score.	Few (22.2%) had high dietary diversity scores while the majority (77.8%) had medium score. Starchy staples (cereals and starchy roots/tubers) (96.7%); fats and oil (95.6%); and legumes, nuts, and seeds (60.0%) were consumed by the majority of the children. Less than half consumed milk and milk products (47.8%), meat, poultry, fish, and seafood (46.7%). Few consumed eggs (13.3%), fruits (35.6%), a…
Ayogu et al., (2016)	Nsukka urban, Enugu.	Cross-sectional	12-18years, in school male and female (n= 400)	BMI-for-age Z-score category. (WHO reference curve, 2007).	The prevalence of stunting was 33.3% and thinness 31.0%. Neither overweight nor obesity was observed. While 64.0% were anaemic (Haemoglobin between 10 to 7 g/dl); 44.0% had vitamin A deficiency (VAD) (≤20µg).
				Anaemia was taken as values of haemoglobin and packed cell volume lower than 12g/dl and 36%, respectively (WHO/UNICEF/UNU. Iron deficiency anaemia, 2001)
Ayogu et al., (2018)	Ede-Oballa, Nsukka, Enugu State.	Cross-sectional	6-15 years, school male and female (n= 450)	Nutritional status (WHO growth for 5 to 19 years, 2007). Vitamin A deficiency was defined as serum retinol level of ≤20 μg/dl. Serum zinc deficiency was defined as values less than 80 μg/dl. (Oguntona et al. 2005)	Prevalence of underweight (18.2%), stunting (41.6%), thinness (20.0%), zinc (43.3%) and vitamin A (51.1%) deficiencies. Energy intake was less than the RNI.
Chinedu et al., (2017)	Ota, Ogun State.	Cross-sectional	2-75 years, in school, male and female (n= 1394)	Underweight, normal, overweight, obesity	6-12years: underweight prevalence, male, 4.7%, female, 12.2%; overweight prevalence male, 9.3%, female 12.9%; obesity, male 7.5%, female 9.4%.
				(CDC age and sex-specific BMI cut-offs for children and adolescent, 2000)	13-19years: underweight prevalence, male, 10.6%, female, 5.5%; overweight, male, 7.2%, female, 8.7% and obesity, male, 2.8%, female, 2.7%.
Darling et al., (2020)	Burkina Faso, Ethiopia, Ghana,	Cross-sectional	10-19years, in a community, male and female (n= 743 for Nigeria)	BMI z-score for age and sex. (WHO reference curve, 2007).	Underweight prevalence was (138)18.6%, overweight was (36) 4.8%, stunted was (118) 15.9%. Only 36 out of 743 (4.9%) consumed fruits and vegetable ≥ 5 serving per day.
	Nigeria (Ibadan, Oyo state), Tanzania and Uganda.
Eme et al., (2016b)	Abia State.	Cross-sectional	10-19years, school, male and female	Fat related anthropometrics, Body Mass Index According to Sex Defined by International Obesity Task Force (IOTF) Cutoff Point.	Underweight prevalence, 3.0%, overweight, 9.7%, obese, 3.5%. 19 years had the highest measurement for triceps (14.60 mm), thigh, (35.05 mm), and MUAC (25.95 mm), while those aged 18 years had the highest measurement for suprailiac (15.00 mm) and subscapular (16.94 mm).
			(n= 600)
Eme et al., (2016a)	Abia State.	Cross-sectional	10-19years, school, male and female (n= 600)	Body Mass Index According to Sex Defined by International Obesity Task Force (IOTF) Cutoff Point.	The prevalence of overweight and obesity was 9.7% and 3.5% respectively. More than 10% of the rural Nigerian adolescent studied were overweight.
Eze et al., 2017)	Enugu State.	Cross-sectional	6-12years, school male and female (n= 2616)	Underweight, stunting, wasting, overweight and obese Z-scores. (WHO growth reference for 5 to 19‑year‑old, 2007).	Wasting, overweight, obesity, underweight, and stunting were noted in 9.3%, 6.3%, 4.4%, 0.9%, and 0.4% of the children, respectively.
Ezeudu et al., (2018)	Anambra State.	Cross-sectional	10-19years, school male and female (n= 984)	Normal weight, BMI- for age between 5th & 85th percentile, overweight, BMI-for-age between 85th and 95th percentile, obesity BMI-for-age ≥ 95th percentile (Must, Dallal & Dietz, 1991).	Underweight prevalence was 4.7%, normal weight was 87.1%, overweight was 5.6% and obese was 2.5%. Significantly, more underweight among public school (6.9%) than private (0.3%0 while private schools adolescent has higher overweight (6.5%) and obesity (5.0%) compared to public school (5.3%) and (1.2%) respectively.
Gezawa et al., (2013)	Maiduguri, Borno state.	Cross-sectional	Age; 15-70years, in a community, male and female (15 -24 years, n= 325 males and 86 females)	Healthy weight, 18.5- 24.9kg/m2, overweight, 25-29.9kg/m2, obese, >30kg/m2 and underweight <18.5kg/m2. (WHO Geneva, 2006)	Overweight prevalence among 15-24years, male (13.2%), female (16.3%); Obesity prevalence, male, (4.3%), females (14.0%).
Isezuo et al., (2018)	Sokoto State.	Cross-sectional	10-18years, in school, male and female (n= 800)	Overweight and obesity CDC centile chart for BMI for boys and girls aged 2 - 20 years.	The prevalence of obesity and overweight was 0.3% and 5.9%, respectively.
Kayode & Alabi, (2020)	Osun State.	Cross-sectional	15-26years, in school, male and female (n= 268).	Food consumption pattern, BMI classified according to the cut-off point by the WHO organization (Chung, Song & Park, 2003).	68.7% are 15-20years. Among them, 2.2% were underweight, 57.5% had a normal weight, 31% were overweight while 9.3% were obese. Reported daily consumption of snacks. Only 18% report fruits consumption daily. 25% consumed vegetable daily.
Lateef et al., (2016a)	Kwara State.	Cross-sectional	9-19 years, in school male and female (n= 515)	Food frequency, Breakfast consumption, Nutritional status was classified according to WHO, (2007)	Snacks, doughnut, biscuits, boiled yam, rice, and boiled sweet potato were among the highest mean composite consumption. Consumed more fatty protein such as ice-cream/yogurt, whole milk shakes and fried/boiled egg. 23% skipped breakfast. Underweight prevalence was 29.1%, overweight was 4.7% and obese was 0.2%.
Lateef et al., (2016b)	Kwara State.	Cross-sectional	10-19years, in school male and female (n= 515)	Food frequency, Breakfast consumption, Nutritional status was classified according to WHO classification, (2007).	The majority (77%) consumed breakfast. Snacks had the highest mean consumption while boiled potatoes had the lowest consumption per week. Overall prevalence of overweight was (4.7%) and obesity (0.2%), while prevalence for male and female overweight (0.6%, 6.7%) and obesity (0%, 0.3%) respectively.
Menakaya & Menakaya, (2022)	Lagos State.	Qualitative	18-19years, in school male and female (n= 18).	Dietary pattern, dietary perception, and practice.	Participants perceived a healthy lifestyle as balanced diet, regular physical activity, and disease prevention.
					Meal skipping and junk food consumption were notable unhealthy dietary practices. Computer and Internet activity was the main sedentary activity.
Morakinyo et al., (2020)	Nigeria.	Cross-sectional	Concern only 15-24years, in a community, only female (n= 9242)	The nutritional status was obtained as	Prevalence of undernutrition was 19.7% among 15-24 years.
				follows; Underweight if BMI<18.5kg/m2.
Mustapha & Sanusi, (2013)	Ondo State.	Cross-sectional	10-19years, in school male and female (n= 2031).	BMI for age percentiles.	Underweight prevalence was 16.4%, overweight was 5.8% and obese was 1.1%.
				(WHO, Anthro-plus)
Nwanneka et al., (2016)	Enugu State.	Cross-sectional	10-19years, in school male and female (n= 250)	Food habit, overweight, obesity, thinness using IOTF (2000).	The prevalence of overweight was 15.7% and thinness was 9.8% among adolescents with lowest family income, while overweight, 3.4% and obese was 5.7% among those from highest family income.
Olatona et al., (2022)	Lagos State.	Cross-sectional	10-19years, in school male and female (397)	Breakfast intake, BMI for age percentiles.	The percentage of adolescents who skipped breakfast was higher among older 16-19 years (52.2%) and middle 13-15 years (43%) than the younger adolescents (34.7%). Girls skipped breakfast more than boys. Prevalence of underweight was 8.4%, overweight was 7.0%, obesity was 3.0%.
				(WHO Anthro-plus)
Oludare, (2015)	Ekiti State. .	Cross-sectional	10-19years, in school male and female (n= 628).	BMI-for-age percentiles.	The prevalence of overweight was 6.7%, obesity was 0.8% and underweight was 4.6%.
				CDC, (2000).
Olumakaiye, (2013)	Ondo State.	Cross-sectional	10-19years, in School females (n= 120).	Dietary iron intake, Serum ferritin concentration of less than 12.0 μg/L with normal hemoglobin concentration	The prevalence of iron deficiency was 47.5%. Iron deficiency was highest among 16- to 19-year-old girls, whereas it was lowest in the 10 to 12-year-old girls. In all, cereal was the most consumed food item followed by fish, legumes, and flesh meat. Dark green leafy vegetables, drinks from plant source, and organ meat were the least consumed. Consumption of non-heme iron was higher (65.8%) than he…
				was analyzed and used to identify iron deficient nonanemic girls.
Omobuwa et al., (2014)	Ibadan.	Cross-sectional	13-18years, in school male and female (n= 93)	BMI percentiles for age and sex. (CDC) online. Child and teen BMI calculator.	The prevalence of underweight was 29%, overweight was 5.4% and obesity was 2.2%. Females were more overweight (6.3%) while male had more underweight (10.3%)
Omuemu & Oko-Oboh, (2015)	Benin city, Edo State.	Cross-sectional	10-19years, in school, male and female (n = 797)	Meal consumption pattern.	The majority of the respondents (71.6%) ate three times a day. Dinner was the meal eaten most often (95.5%), followed by lunch and breakfast. Snacking habits were common among 87%. Meal skipping was common among 88% and was higher among females than males. The reasons for skipping meals included staying for after-school activities (45.1%), time constraint in the morning (43.4%), not being hungry …
Onyiriuka, Umoru, et al., (2013)	Beni city, Edo State.	Cross-sectional	12-19years, in school, male and female (n= 2097).	Eating habit, underweight, normal weight, overweight	48.1% skipped a meal at least a fortnight. Breakfast was the most frequently skipped meal (46.3%) because of lack of appetite and time. Only 15.2% reported daily consumption of fruits and vegetables. Over half of the participants (60.2%) ate fast food at least once a week, with 76.4% of them consuming fast food along with soft drinks. The prevalence of both overweight and obesity were higher amon…
				and obese (BMI for age ≥95th percentile), using WHO criteria,1995.
Onyiriuka, Ibeawuchi, et al., (2013)	Benin city, Edo Sate.	Cross-sectional	12-19years, in school females (n= 2097)	Eating habit	Skipping breakfast was 46%. Only 15% of the participants consume fruits and vegetables daily. 60% of the participants consumed fast food with 76% of them consuming fast food along with soft drinks.
Oriaifo et al., (2020)	Benin, Edo State.	Cross-sectional	6-18years, in school male and female (n= 1067)	Fat mass, overnutrition and obesity using mid upper arm circumference (MUAC) and bioelectrical impedance analysis (BIA).	The prevalence of overweight and obesity using MUAC was 6.0% and 6.4% respectively, and by BIA was 5.4% and 6.9%. The mean MUAC, percent body fat, fat mass and fat mass index were higher in females than in males.
Sanusi et al., (2022)	Ibadan, Oyo state.	Cross-sectional	4-13years, in a community, male and female (n= 955)	Meal and dietary pattern.	88% of children had at least three meals including breakfast (95%), lunch (85%), dinner (92%) and midmorning meals (48%), while about 60% ate snacks at least once daily. The most frequently consumed foods were yam, cassava, rice, maize, bread, and beans/peas/legumes. Consumption of carbohydrates foods were high while that of proteins were low and even from plant base sources. There was low fruits…
Senbanjo et al., (2014)	Abeokuta, Ogun State.	Cross-sectional	5-19years, in school male and female (n= 570)	Body mass index, triceps skin fold thickness (TSF), upper arm muscle area (UAMA), upper arm fat area (UAFA), fat percentage and upper arm muscle area b height (UAMAH) Degree of stunting and wasting (National Center for Health Statistics (NCHS) and WHO guideline, 1995).	The TSF, UAFA and fat percentage were significantly higher in females than males at each age group. MUAC and UAMA were significantly higher in female children aged 10-14 years, whereas UAMA was significantly higher in male children aged 15-19 years. The sensitivity and specificity of UAMAH for detecting wasting were 80.8% and 63.9%, respectively, whereas the corresponding values for stunting were…
Sholeye et al., (2018)	Sagamu, Ogun state.	Cross-sectional	14-19years, in school male and female (n= 620)	Snacking and sweetened beverages consumption.	Daily consumption of sweetened drinks was 24.2%.
					78.5% preferred carbonated drinks, 44.2% consumed energy drinks. 51.7% snacked daily. Almost all (95.3) snacked at varying frequencies with more females snacking than males. Pies and pastries were the most frequently consumed.
Tassy et al., (2021)	Ibadan, Oyo state.	Cross-sectional	4-13years, in a community, male and female (n= 955).	Dietary and nutrient intake,	The prevalence of stunting among 9-13years was 18.2%, thinness was 21.0%, overweight was 3.0% and obesity was 1.6%.
			9-13years (n= 434)	Obesity; BMI-for-age > 2 (SD), overweight; BMI-for-age >1 SD and thinness	The nutrient intake for 9-13 years was 1590Kcal/day. There was an inadequate intake of proteins from 7% of the respondents. Iron intake was 11mg/day lower than EAR of 16.4mg/day, calcium intake was 301mg/d lower than EAR of 1100mg/d. Almost all had inadequate intakes of folate, vitamin A, C, and D. Majority (55-80% had intakes of thiamin, riboflavin, and vitamin B12 below the EAR.
				BMI-for-age < 2 SD.
				Stunted; Height-for-Age index <2 SD. (WHO, BMI-for-Age (5–19 Years, 2007)
Tokunbo et al., (2014)	Ille-Ife, Osun state.	Cross-sectional	11-22years, in school male and female (n= 422)	Snacking habit	Biscuits are the most consumed snack with fresh fruits, doughnuts, sweets, chocolate, and ice cream having scores above the average. 58.3% consumed soft drinks in-between meals. Taste mostly determines the choice of food and drinks.
Toriola et al., (2018)	Ekiti State, Nigeria, and South Africa.	Cross-sectional	9-13yreas, in school male and female (n= 1229)	BMI category (CDC & IOTF)	The prevalence of underweight was 66.5% for boys, 73.3% for girls. Overweight prevalence was 1.2 and 1.1% for boys and girls respectively. Obese was 1.7% for boys and 0.8% for girls.
Ubesie et al., (2016)	Enugu state.	Cross-sectional	10-19years, in school male and female (n= 2,419)	Obesity was defined as	Overweight and obesity prevalence was 7.2% and 5.7% respectively. Females were more likely to be overweight and obese. Underweight was 3.4% for males and 0.3% for females.
				BMI ≥95th percentile for age and sex, and overweight
				as BMI >85th percentile but <95th percentile for age
				and sex (Harvard school of public Health),
Umeokonkwo et al., 2020)	Ebonyi State.	Cross-sectional	6-12years, in school male and female (n= 780)	Undernutrition, over-nutrition, underweight,	Prevalence of undernutrition was 15.7% and that of over-nutrition was 2.1%. The prevalence of underweight (8%), thinness (7.2%), stunting (9.9%), overweight (1.4%) and obesity (0.7%).
				thinness, stunting, overweight and obesity (WHO Anthro-plus software, 2007)
Wariri et al., (2020)	Gombe and Uyo State.	Cross-sectional	10-18years, in school, male and female (n= 2100)	BMI-for-age z-scores (BAZ) and height-for-age z-scores (HAZ) were gen­erated using the WHO Anthro-Plus software, which is based on the WHO 2006 growth reference charts for 5–19 years old children.	In all, the prevalence of thinness was 6.8%. overweight/obesity was 12.4%.
					Gombe: Thinness was 11.98%, overweight/obesity was 16.08%.
					Uyo: Thinness was 5.3%, overweight/obese was 11.27%.
Adekanmbi et al., (2016)	Ogun State.	Cross-sectional	10-19years, in school male and female (n= 572)	Stunting and wasting. (CDC Standard reference charts 2007)	Wasting 26.7%, stunting 24.8%
Akhimienho & Uwaibi, (2022)	Uyo, Akwa Ibon State.	Cross-sectional	10-18years, in school male and female (n= 1701)	Stunting: height for age Z-score ≤ -2SD, Wasting: BMI Z-score ≤ -2SD (WHO,2021).	9.8% were stunted, 12.9%were wasted,
					60.8% of male were stunted while 39.8% of females wasted.
Gadanya et al., (2022)	Kano state.	Cross-sectional	10-22years, in school all females (n= 137)	BMI (WHO, 2005)	55.42% underweight, 0.79% overweight, 0.73% obese.
Omotoso et al., (2022)	Illorin, Kwara State.	Cross-sectional	10-19years, in school. Male and female (n= 512)	Dietary pattern, stunted, underweight, overweight or obese. BMI-for-age z-score for 5 to 19years	21% were underweight, 20% were overweight, 12.1% were stunted and 0.1% obese. The dietary pattern was starchy and meat consumption was rare. Meal skipping and snacking were common.
				(WHO, 2007)
Otuneye et al., (2017)	Abuja.	Cross-sectional	10-19years, in school male and female (n= 1550)	Dietary pattern,	Stunting (11.2%), overweight (12.6%) and wasting (1.7%). Food preferences were good taste among 35.2%, balanced diet 34.2%. Carbonated drinks within the previous 7days were 35.2% and 9.5% missed breakfast, lunch, and supper as a single meal. Breakfast only was skipped by 4.6% while 10.3% took lunch outside the home.
				Body Mass Index were determined using the
				2007 WHO charts.
Yusuf et al., 2021)	Sokoto state.	Cross-sectional	10-19 years in a community, male and female (n= 198)	The nutritional status was determined using WHO BMI (WHO reference curve, 2007).	About a third (30.3%) of the respondents
					were stunted, 33 (16.7%) wasted and 3(1.5%) were overweight.
